# Supplementary material for: Facile synthesis and the photo-catalytic behavior of core–shell nanorods
Source: Royal Society of Chemistry journal article supplement (doi:10.1039/c3ra47024e), 2013-12-18
Supplement: c3ra47024e.pdf [file c3ra47024e.pdf]

## Facile synthesis and the photo-catalytic behavior of core-shell nanorods

Kamala Kanta Nanda,<sup>a,b</sup> Smrutirekha Swain,<sup>a,b</sup> Biswarup Satpati,<sup>c</sup> Laxmidhar Besra<sup>a,b</sup> and Yatendra S. Chaudhary<sup>\*a,b</sup>

<sup>a</sup>Colloids and Materials Chemistry Department, CSIR-Institute of Minerals and Materials Technology, Bhubaneswar-751 013, India; Fax: +91-674-2581637; Tel.:+91-674-2379248; \*E-mail: yschaudhary@gmail.com

<sup>b</sup>Academy of Scientific and Innovative Research (CSIR-AcSIR), New Delhi, India

<sup>c</sup>Surface Physics Division, Saha Institute of Nuclear Physics, 1/AF, Bidhannagar, Kolkata 700 064, India

### SUPPLEMENTARY INFORMATION

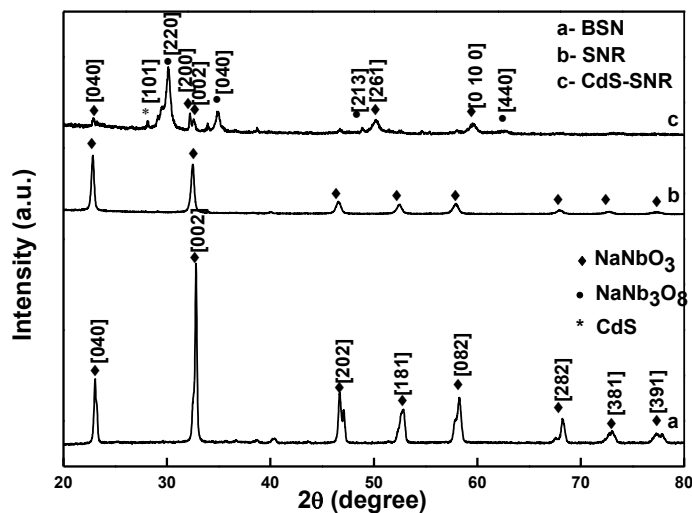

**Figure S1.** XRD pattern for SNR, CdS-SNR and BSN samples

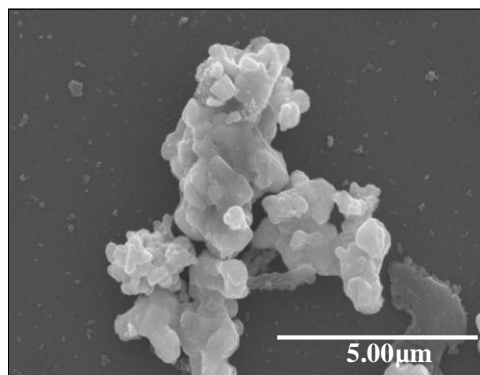

**Figure S2.** SEM image of BSN powder sample

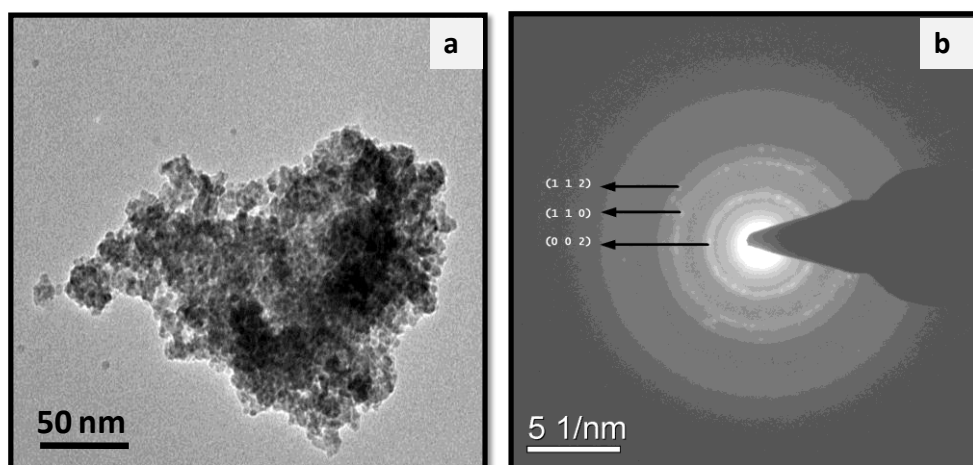

**Figure S3.** TEM image of CdS nanoparticle (a) and SAED pattern (b)

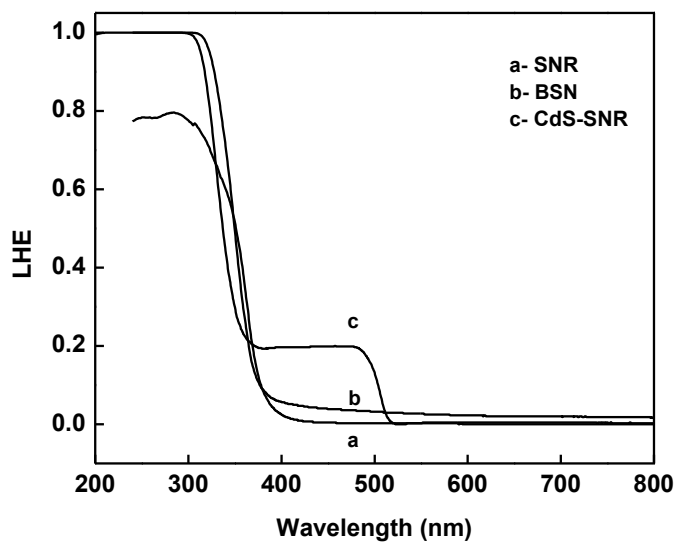

**Figure S4.** Light harvesting efficiency at different wavelengths for unmodified and CdS modified sodium niobate samples

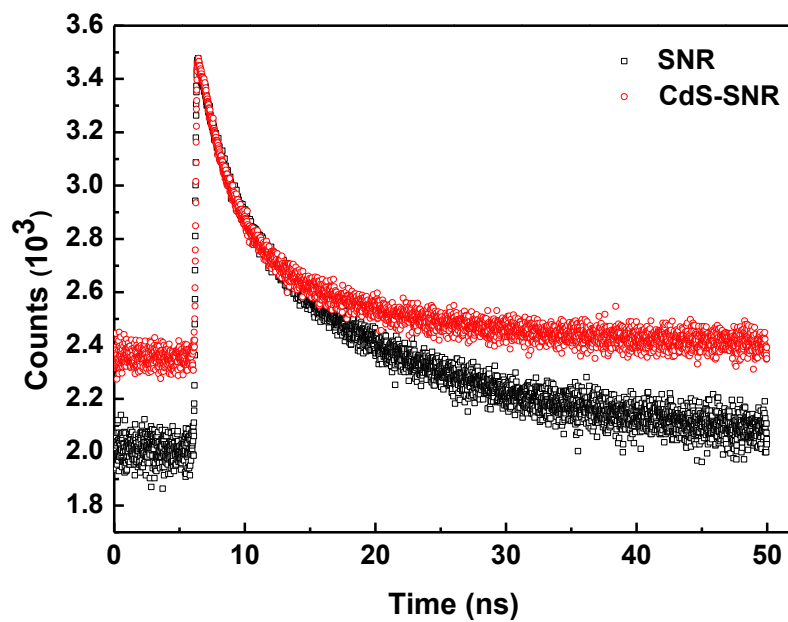

**Figure S5.** Time -resolved photoluminescence spectra for SNR and CdS-SNR.
